RESEARCH ARTICLE

# Early short-term PXT3003 combinational therapy delays disease onset in a transgenic rat model of Charcot-Marie-Tooth disease 1A (CMT1A)

Thomas Prukop<sup>1,2</sup>, Jan Stenzel<sup>1</sup>, Stephanie Wernick<sup>1</sup>, Theresa Kungl<sup>1</sup>, Magdalena Mroczek<sup>1</sup>, Julia Adam<sup>1</sup>, David Ewers<sup>1</sup>, Serguei Nabirovitchkin<sup>3</sup>, Klaus-Armin Nave<sup>1</sup>, Rodolphe Hajj<sup>3</sup>, Daniel Cohen<sup>3</sup>, Michael W. Sereda<sup>1,4\*</sup>

**1** Max-Planck-Institute of Experimental Medicine, Department of Neurogenetics, Göttingen, Germany, **2** University Medical Center Göttingen, Institute of Clinical Pharmacology, Göttingen, Germany, **3** Pharnext, Issy-Les-Moulineaux, France, **4** University Medical Center Göttingen, Department of Clinical Neurophysiology, Göttingen, Germany

\* [sereda@em.mpg.de](mailto:sereda@em.mpg.de)

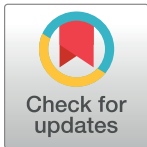

**OPEN ACCESS**

**Citation:** Prukop T, Stenzel J, Wernick S, Kungl T, Mroczek M, Adam J, et al. (2019) Early short-term PXT3003 combinational therapy delays disease onset in a transgenic rat model of Charcot-Marie-Tooth disease 1A (CMT1A). PLoS ONE 14(1): e0209752. <https://doi.org/10.1371/journal.pone.0209752>

**Editor:** Janitza L. Montalvo-Ortiz, Yale University School of Medicine, UNITED STATES

**Received:** June 15, 2018

**Accepted:** December 11, 2018

**Published:** January 16, 2019

**Copyright:** © 2019 Prukop et al. This is an open access article distributed under the terms of the [Creative Commons Attribution License](https://creativecommons.org/licenses/by/4.0/), which permits unrestricted use, distribution, and reproduction in any medium, provided the original author and source are credited.

**Data Availability Statement:** All relevant data are within the paper and its Supporting Information files. The components of PXT3003 (baclofen, naltrexone and sorbitol) are commercially available and could be mixed at the specified ratio and dosages to be tested by any researcher. The compounds can be ordered from Sigma as specified in the manuscript (RS)-baclofen (reference B5399), naltrexone hydrochloride (reference N3136) and D-sorbitol (reference S3889).

## Abstract

The most common type of Charcot-Marie-Tooth disease is caused by a duplication of *PMP22* leading to dysmyelination, axonal loss and progressive muscle weakness (CMT1A). Currently, no approved therapy is available for CMT1A patients. A novel polytherapeutic proof-of-principle approach using PXT3003, a low-dose combination of baclofen, naltrexone and sorbitol, slowed disease progression after long-term dosing in adult *Pmp22* transgenic rats, a known animal model of CMT1A. Here, we report an early postnatal, short-term treatment with PXT3003 in CMT1A rats that delays disease onset into adulthood. CMT1A rats were treated from postnatal day 6 to 18 with PXT3003. Behavioural, electrophysiological, histological and molecular analyses were performed until 12 weeks of age. Daily oral treatment for approximately 2 weeks ameliorated motor deficits of CMT1A rats reaching wildtype levels. Histologically, PXT3003 corrected the disturbed axon calibre distribution with a shift towards large motor axons. Despite dramatic clinical amelioration, only distal motor latencies were improved and correlated with phenotype performance. On the molecular level, PXT3003 reduced *Pmp22* mRNA overexpression and improved the misbalanced downstream PI3K-AKT / MEK-ERK signalling pathway. The improved differentiation status of Schwann cells may have enabled better long-term axonal support function. We conclude that short-term treatment with PXT3003 during early development may partially prevent the clinical and molecular manifestations of CMT1A. Since PXT3003 has a strong safety profile and is currently undergoing a phase III trial in CMT1A patients, our results suggest that PXT3003 therapy may be a *bona fide* translatable therapy option for children and young adolescent patients suffering from CMT1A.

**Funding:** MWS was supported by the German Ministry of Education and Research (BMBF, CMT-BIO, FKZ: 01ES0812, CMT-NET, FKZ: 01GM1511C, CMT-NRG, ERA-NET 'ERARE3', FKZ: 01GM1605). MWS holds a DFG Heisenberg Professorship (SE 1944/1-1). TP was supported by the European Leukodystrophie Society (ELA 2014-02011 to MWS). KAN is supported by the DFG (SPP1757 and CNMPB) and holds an ERC Advanced Grant. This trial was financially supported by Pharnext who provided support in the form of salaries for authors SN, RH and DC, but did not have any additional role in the study design, data collection and analysis, decision to publish, or preparation of the manuscript. The specific roles of these authors are articulated in the 'author contributions' section.

**Competing interests:** We have the following interests. This trial was financially supported by Pharnext, the employer of Serguei Nabiroitchkin, Rodolphe Hajji and Daniel Cohen. DC, RH, MWS, TP and KAN submitted a patent based on this work: Full patent name: Early treatment of CMT disease Number: US2018/0000813. MWS, TP and KAN act as consultants to Pharnext. PXT3003 achieved a Phase 3 trial in CMT1A adult patients. There are no further patents related to this study, or marketed products to declare. This does not alter our adherence to all the PLOS ONE policies on sharing data and materials, as detailed online in the guide for authors.

## Introduction

Charcot-Marie-Tooth disease (CMT) is the most common inherited peripheral neuropathy with a prevalence over one in 2500 [1,2]. With Next Generation sequencing over 90 genes were linked to CMT [3,4], of which the most common type (CMT1A, over 39%, [5,6] is caused by a duplication of the gene encoding for the peripheral myelin protein of 22 kDa (*PMP22*) [7–9]. Although dysmyelination and onion bulb formation are prominent histological hallmarks, the progressive clinical phenotype is determined by the degree of axonal loss which cause progressive muscle weakness and sensory deficits [10–15]. Although disease variability is high, walking disabilities, foot deformities and electrophysiological abnormalities are already present in childhood and can lead to severe disabilities throughout life-span [16–18]. Recently, young CMT1A patients were found to progress at a rate of 14% using the CMT Pediatric Scale (CMTPedS) which is a sensitive outcome measure for clinical trials [18]. Despite several promising trials in animal models, no causal treatment is available for any form of CMT yet [14,19]. Neither trials of exercise and orthosis, nor pharmacological such as oral administration of ascorbic acid showed beneficial effects in patients with CMT1A [17,20–23]. The early onset of the disease raises the question of an effective, in best-case a preventive therapy option for young CMT1A patients.

PXT3003 is a combination of low-dose baclofen, naltrexone and sorbitol. The single composite drugs were identified by using a systems biology approach in order to target G-coupled receptor signalling pathways that were predicted to lower *Pmp22* mRNA expression, but also pathways important for myelination and axonal integrity. PXT3003 was reported to reduce *Pmp22* mRNA expression in vitro and slow disease progression in adult phenotypically affected CMT1A rats after chronic long-term dosing [24]. Importantly, due to synergistic action by each of the single drugs, PXT3003 can be applied at an approximately 10-fold lower dose than the approved dose of single drugs. Tolerability and safety were proven in an exploratory clinical phase II study in CMT1A patients [25,26]. Currently, the efficacy of PXT3003 is being investigated in a confirmatory randomised, double-blind, placebo-controlled phase III study (*ClinicalTrials.gov identifier NCT03023540*).

Increased *Pmp22* levels in Schwann cells induce an early postnatal differentiation defect characterized by the aberrant expression of genes characteristic for immature Schwann cells such as *Sox2* and *c-Jun* [27,28]. While CMT1A is caused by a primary defect in Schwann cells, the consequent dysmyelination and lack of trophic support finally leads to axonal dysfunction and loss. Hence, promoting Schwann cell differentiation may be one possible approach—beyond *Pmp22* mRNA regulation itself—to prevent dysmyelination and the resulting axonal degeneration leading to clinical symptoms. We previously demonstrated an early reduction of the phosphatidylinositol 4,5-bisphosphate 3-kinase (PI3K)-AKT murine thymoma viral oncogene homolog 1 (AKT) signaling in CMT1A rat sciatic nerves during early postnatal development (postnatal day 1, P1) which was followed by an increase of the mitogen-activated protein kinase 1 (MEK)–mitogen-activated protein kinase (ERK) at P6. PI3K-AKT and MEK-ERK signalling are two opposing pathways regulating Schwann cell differentiation. The binding of axonally derived neuregulin-1 to ErbB receptors in the Schwann cell plasma membrane activates the PI3K-AKT signalling cascade, thereby regulating myelin sheath thickness in the PNS [29]. In a proof-of-principle approach, we applied the soluble EGF-like domain of recombinant human neuregulin-1 (rhNRG1) early postnatally over short-term during the critical time window of Schwann cell differentiation in CMT1A rats. rhNRG1 treatment increased PI3K-AKT and decreased MEK-ERK signalling which drove *Pmp22* transgenic Schwann cells towards differentiation and preserved peripheral nerve axons. Consecutively, muscle strength was restored until adulthood [27]. These

observations highlighted the importance of an early therapeutic window for future drug therapy regimes in CMT1A patients.

Hence, in the present study, we tested the hypothesis that PXT3003 treatment downregulates *Pmp22* during the critical time window of Schwann cell differentiation and can overcome the known impaired peripheral nerve development in CMT1A. This, in turn, may cause sustained axonal support and amelioration of the clinical phenotype into adulthood.

## Materials and methods

### Animals and husbandry

Male *Pmp22* transgenic Sprague-Dawley rats (CMT1A rats, [30]) and corresponding male wildtype controls were used. All rats were housed in a climate-controlled environment on a 12h light/dark cycle with free access to water and sorbitol-free food (V1325-318, SNIFF, Germany).

### Genotyping

Animals were genotyped by standardized methods based on the polymerase chain reaction (PCR) as previously described [27]. After local anaesthesia with lidocaine gel 2%, a tail biopsy was taken from 2 days old rats, and the paws were tattooed for identification. Isolation of genomic DNA from tail biopsies was performed according to standard manufacturer's instructions (Qiagen, Germany).

### Test items, vehicle, dosages and application

PXT3003 is a mix in a fixed ratio of baclofen, naltrexone hydrochloride and D-sorbitol (Sigma-Aldrich, Germany) dissolved in phosphate buffer at pH = 5.4, and stored between +2°C and +8°C protected from light for the maximum of 1 week. Phosphate buffer alone was used as placebo vehicle for wildtype and CMT1A controls. Three increasing dosages of PXT3003 were applied to CMT1A rats by daily oral gavage with baclofen 15 µg/kg/day, naltrexone hydrochloride 1.75 µg/kg/day and D-sorbitol 0.525 mg/kg/day (called PXT3003-1 in the following), baclofen 30 µg/kg/day, naltrexone hydrochloride 3.5 µg/kg/day and D-sorbitol 1.05 mg/kg/day (PXT3003-2), and baclofen 60 µg/kg/day, naltrexone hydrochloride 7 µg/kg/day and D-sorbitol 2.1 mg/kg/day (PXT3003-3).

### Sample size, group allocation, study regimen and euthanasia

Known treatment effects from our former studies in CMT1A rats were used for the sample size calculation. Group allocations were performed by random and stratified for the genotype, weight and litter allocation. Early short-term treatment took place from postnatal day 6 until 18 followed by long-term observational phenotyping at postnatal weeks 3, 9 and 12. At study end, rats were anaesthetised for additional electrophysiological measures. Anaesthesia was applied as 100 mg/kg body weight ketamine (Ketanest) and 20 mg/kg xylazine (Rompun) in a 1:1 ratio. CO<sub>2</sub> inhalation without reawakening from the anaesthesia was used prior to tissue collections for histology, RNA and protein analysis.

### Phenotyping

All phenotype tests were performed blinded by the same investigator on the same time every day. Motor performance was measured by grip strength investigation for the forelimbs and hindlimbs using a digital newton meter (Model 708, Erichsen, Germany). Rats were motivated to grip a horizontal T-bar with their forelimbs and the investigator pulled them horizontally

down until the rats lost grip. Hind limb grip strength was measured by supporting the fore limbs and pulling the animal's tail toward the horizontal bar. Each time the maximum force exerted onto the T-bar before the animals lost grip was recorded. Measures were repeated at least 5 times per limb and the means were calculated. The inclined plane test was used to measure the motor coordination by using a plexiglas plane adjusted to an angle of 25°. Rats were placed on the inclined plane in the up-headed position as published by Rivlin and colleagues [31]. Measures were repeated at least 2 times per animal and the means were calculated. The performance was evaluated by 4 different scores: no slide = 0, sliding of one or two paws = 1, sliding of all four paws = 2, sliding to the very bottom of the plane = 3. Compound muscle action potentials (CMAP), distal motor latencies (DML) and nerve conduction velocities (NCV) were measured at the tail of anesthetized rats (Model Neuroscreen, Jaeger-Toennies, Germany). The tail was placed into an oil bath (37°C) to keep the tail's temperature constant for the measurements. Stimulation was performed with increasing voltage of 0.1ms duration until supramaximal stimulation. Maximum CMAPs were calculated peak to peak, DML as interval between the stimulation and the observed response and nerve conduction velocity from the distance between proximal and distal stimulation.

### Histology

Two peripheral nerves (tibial and sciatic nerve) were removed and fixed in 4% paraformaldehyde and 2.5% glutaraldehyde in phosphate buffer, then embedded in epoxy resin and cut into 0.5 µm thick cross sections using a microtome (Leica, Germany). After staining with methylene blue / Azur II, the total number of myelinated axons per nerve was counted. In more detail, myelin sheath thickness (g-ratio = axon circumference divided by circumference of the axon plus myelin sheath) and axon diameter of 150 axons nerve were analysed which were randomly distributed throughout the entire. This analysis was performed on light microscopic images by a blinded investigator using open-source ImageJ software.

### RNA and protein expression

Two peripheral nerves (sciatic nerve and brachial plexus) were frozen in liquid nitrogen and stored at -80°C until use. For RNA and protein isolation samples were homogenized in 80% sucrose buffer containing protease inhibitor and phosphatase inhibitor according to manufacturer's instructions (Roche, Germany). The lysate was added to RLT buffer and RNA isolation followed manufacturer's instructions (Qiagen, Germany). For quantitative reverse transcriptase PCR (RT-PCR) analysis, cDNA was synthesized from total RNA using random nonamer primers and Superscript III reverse transcriptase (ThermoFischer, Germany). SYBR Green RT-PCR master mix (Qiagen, Germany) was prepared to a final reaction volume of 10 µl. The RT-PCR followed a two-step protocol (Model LC480, Roche, Germany), and quantitation of PCR product was performed using the comparative  $\Delta\Delta C_t$  method. Each sample was measured in at least three replicates and averaged. The genes of interest and housekeeping genes used for normalisation are indicated in the corresponding figure legends. In case of total *Pmp22*, primers were designed to quantify endogenous and transgene-derived gene expression containing Schwann cell specific exon 1A and ubiquitously expressed exon 1B [32]. *Pmp22* splice variant primers were adapted according to Visigalli et colleagues to cover exon 1B containing splice variants 2 and 6, which however both were shown to be expressed in peripheral nerves [33]. Primer sequences were as follows: total *Pmp22* sense 5'-TGTACCACATCCGCC TTGG-3' and antisense 5'-GAGCTGGCAGAAGAACAGGAAC-3', *Pmp22* splice variant sense 5'-GCTGTCCCTTTGAACTGAAA-3' and antisense 5'-GAACAG GATCCCCAACAAAGAGTAG-3', *cJun* sense 5'-CCTTCTACGACGATGCCCTC-3' and

antisense 5`-GGTTCAAGGTCATGCTCTGTTT-3`, *Sox2* sense 5`-TCCAAAAA CTAATCACAACAATCG-3` and antisense 5`-GAAGTGCAATTGGGATGAAAA-3`, *Ctsa* sense 5`-TTACAGAGCACGGTCCCTTC-3` and antisense 5`-ATATA CAGCATGTTGGCAATCAG-3`, *Hmgcr* sense 5`-CAACCTTCTACCTCAGCAAGC-3` and antisense 5`-CACAGTGCCACACACAATTTCG-3`; *Prx* sense 5`-GAGCCT CAGTTTG CAGGAAG-3` and antisense 5`-TTGTAGGGCTCGGCACAT-3`; *Mpz* sense 5`-GTCCAGTGAATGGGTCTCAGATG-3` and antisense 5`-CTTGGCAT AGTGAAGATTGAAA-3`, *Cyclophilin-A* sense 5`-AGCACTGGGGAGAAAGGA TT-3` and antisense 5`-AGCCACTCAGTCTTGGCAGT-3`, and *Rplp0* sense 5`-GATGCC CAGGAAGACAG-3` and antisense 5`-CACAATGAAGCATTTTGGG TAG-3`.

Remaining lysate was used for Western Blot analyses of previously reported misbalanced phosphorylated / non-phosphorylated PI3K-AKT and MEK-ERK as a *Pmp22* downstream signalling pathway in CMT1A [27]. Protein concentration was determined by the Bradford assay and equal amounts were denatured in Laemmli buffer containing 10%  $\beta$ -mercaptoethanol. Gel electrophoresis was carried out for 90 minutes at 100V (BioRad, Germany). Transfer was carried out for 1 hour at 350 mA (BioRad, Germany). Relative protein amounts were determined via staining the membranes with fast green (Sigma, Germany) and using a fluorescent imager (Intas Science Imaging, Germany). Membranes were then washed briefly in washing buffer and then transferred to blocking buffer for 1 hour. Western blots were incubated overnight with primary antibodies against p-AKT, AKT, p-MAPK, MAPK (all polyclonal rabbit; 1:1,000, Cell Signaling; pAKT No. 3787S, batch No. 8; AKT No. 4691S, batch No. 20; MAPK No. 4695S, batch No. 21; pMAPK No. 9101S, batch No. 30), and 30 min with a peroxidase conjugated secondary antibody (AffiniPure goat anti-rabbit IgG (H+L); 1:1000; Jackson Immuno Research Laboratories, USA). Quantification was performed using Western Lightning Plus-ECL, Enhanced Chemiluminescence Substrate (Perkin Elmer) and a luminescence imager (Intas Science Imaging, Germany).

## Statistics

GraphPad Prism software was used for all analysis. Data is presented as means  $\pm$  the standard deviation. Significance was determined by applying the unpaired students T-Test; ns = not significant, \* =  $p < 0.05$ , \*\* $p < 0.01$  and \*\*\* =  $p < 0.001$ .

## Study approval

All experimental procedures involving animals were discussed by an in-house review committee considering the sense and need of the study incl. animal welfare, and further approved by the Niedersächsisches Landesamt für Verbraucherschutz und Lebensmittelsicherheit (LAVES) by approval number 33.19-42502-04-15/1748 prior to study start.

## Results

PXT3003 treatment in CMT1A rats was performed over 13 days in three increasing dosages (PXT3003-1/-2/-3) early short-term from postnatal day 6 until 18 followed by long-term observational phenotyping at postnatal week 3, 9 and 12. Also, wildtype rats received PXT3003 for adverse effect investigations, and CMT1A and wildtype rats treated with placebo served as controls. At the end of the study electrophysiological measurements, histological evaluation and mRNA and protein expression analysis were conducted in peripheral nerves (Fig 1A).

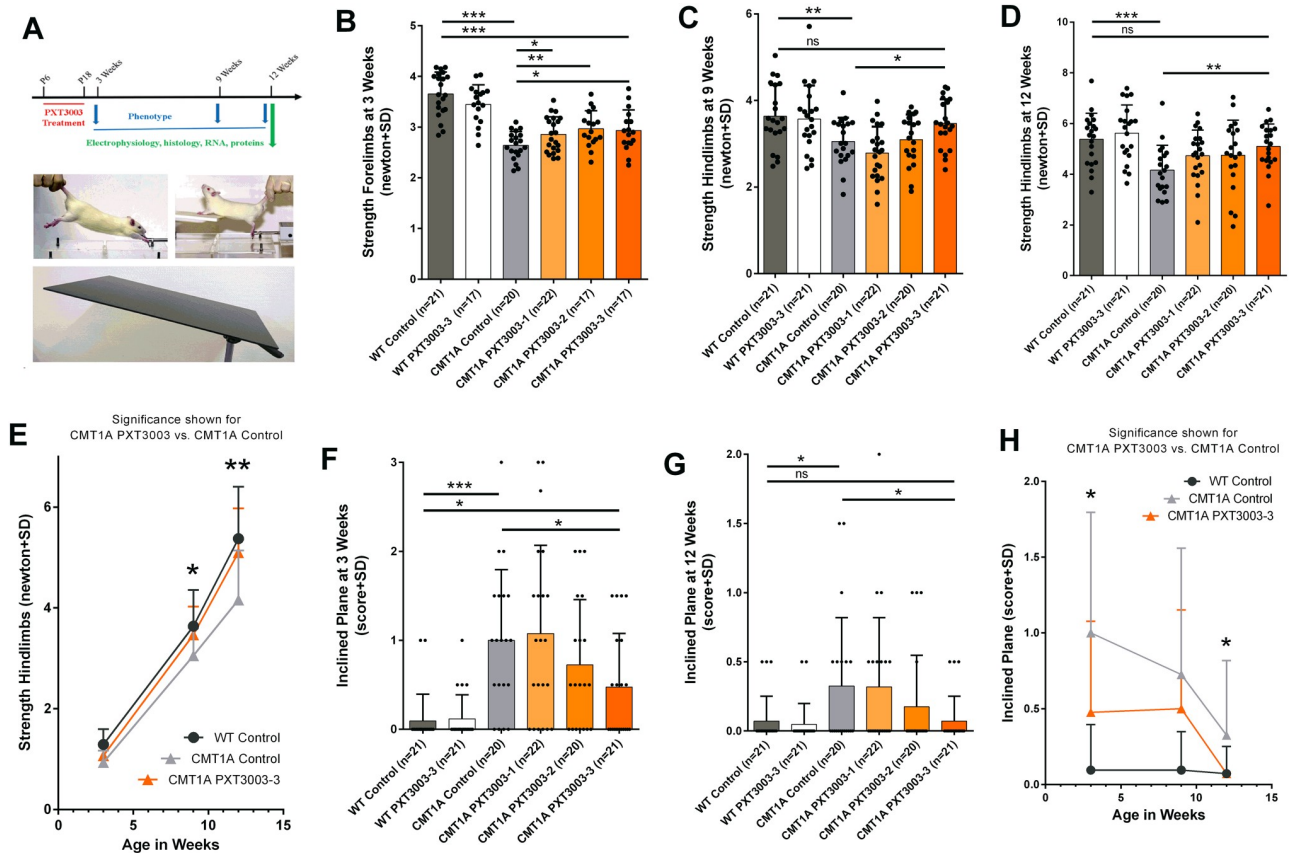

**Fig 1. Long-lasting restoration of phenotype deficits after early short-term PXT3003 therapy.** Early short-term therapy regimen followed by a long-term observation of motor and sensory, histological and molecular effects (A). Early postnatally PXT3003 application dose-dependently improved the grip strength impairment at the forelimbs after the treatment phase in 3 weeks aged CMT1A rats (B; WT controls  $3.66 \pm 0.09$ , CMT1A controls  $2.64 \pm 0.06$ , CMT PXT3003-3  $2.93 \pm 0.10$ ). First grip strength improvement was observed at the hindlimbs in 9 weeks aged CMT1A rats (C; WT controls  $3.64 \pm 0.16$ , CMT1A controls  $3.06 \pm 0.12$ , CMT PXT3003-3  $3.47 \pm 0.12$ ) lasting until 12 weeks (D; WT controls  $5.38 \pm 0.23$ , CMT1A controls  $4.16 \pm 0.22$ , CMT PXT3003-3  $5.10 \pm 0.19$ ). PXT3003 long-term effects increased over time reaching wildtype levels in the long-term observation (E). PXT3003 early short-term therapy improved motor deficits on the inclined plane in 3 (F; WT controls  $0.10 \pm 0.07$ , CMT1A controls  $1.00 \pm 0.18$ , CMT PXT3003-3  $0.48 \pm 0.13$ ) and 12 weeks aged CMT1A rats (G; WT controls  $0.07 \pm 0.04$ , CMT1A controls  $0.33 \pm 0.11$ , CMT PXT3003-3  $0.07 \pm 0.04$ ). Although some training effects were observed in the inclined plane behaviour in CMT1A controls, PXT3003 effects increased over time and reached wildtype levels at the study end (H). (ns = not significant, \* =  $p < 0.05$ , \*\*  $p < 0.01$  and \*\*\* =  $p < 0.001$ ).

<https://doi.org/10.1371/journal.pone.0209752.g001>

### Increasing long-term phenotype effects after early short-term PXT3003 therapy

At treatment start, i.e. before the manifestation of obvious phenotype deficits, body weights did not differ between 6 days aged wildtype and CMT1A controls, and all CMT1A PXT3003 groups showed comparable body weights representing a well-balanced randomisation (S1A Fig). Throughout the long-term observational study duration until postnatal week 12, CMT1A controls showed a reduced body weight (S1B Fig), weaker muscle strength and impaired motor coordination compared to wildtype controls. Generally, no adverse effects were observed in PXT3003 treated wildtypes regarding the body weight (S1B Fig), muscle strength (Fig 1B–1D) and motor coordination (Fig 1F and 1G).

In the grip strength analysis, we observed a significant therapeutic improvement of the forelimb strength once early in 3 weeks aged PXT3003 short-term treated CMT1A rats (i.e 3 days after treatment cessation) for all PXT3003 dosages compared to CMT1A controls (Fig 1B and S1C Fig). In contrast, at this time point, hind limb muscle strength only showed a dose-

dependent trend in PXT3003 short-term treated CMT1A rats (without reaching significance), possibly owing to the longer axons innervating muscles of the hindlimb in line with previous experimental trials in CMT1A rats [32,34] (Fig 1E). However, at 9 weeks of age PXT3003-3 short-term treated CMT1A rats showed increased hind limb muscle strength, when compared to CMT1A controls, reaching wildtype levels (Fig 1C). This treatment effect even increased until the study end at postnatal week 12 (Fig 1D and 1E).

Motor performance was also measured using the inclined plane test [31]. At postnatal week 3, we already observed a dose-dependent significant improvement of motor coordination in PXT3003 short-term treated CMT1A rats when compared to littermate controls (Fig 1F). 9 weeks later, the short-term treatment effect on motor coordination further increased in 12 week aged CMT1A rats treated with PXT3003-3 to reach wildtype levels (Fig 1G and 1H). Despite training effects observed in CMT1A rats, placebo-treated CMT1A controls did not reach wildtype levels at study end in contrast to PXT3003-treated CMT1A rats (Fig 1G). Wildtype rats did not show relevant phenotypical deficits in the inclined plane test throughout the study, and therefore no training effect could be observed (Fig 1H).

### Improved distal motor latencies at end of trial

At the end of the long-term observational period (at 12 weeks of age), we detected significant prolongation of the motor latencies, reduction of the nerve conduction velocity (NCV) and the compound motor action potential (CMAP) in CMT1A controls compared to the wildtype controls (representative recordings shown in Fig 2A). Early short-term PXT3003 treatment in CMT1A rats dose-dependently improved distal motor latencies reaching significance for PXT3003-3 compared to CMT1A controls (Fig 2B). However, we did not detect significant therapy effects on NCV and CMAP recordings after PXT3003 short-term treatment in CMT1A rats compared to corresponding CMT1A controls (Fig 2D and 2F). In line with these results, distal motor latencies significantly correlated with hind limb muscle strengths in all 12 weeks aged PXT3003 treated CMT1A rats (Fig 2C), whereas NCV and CMAP recordings did not (Fig 2E and 2G).

### Increased number of larger-calibre axons after PXT3003 therapy

At trial end, total number of myelinated axons, the axon calibre size and myelin sheath thickness were quantified in peripheral nerves (representative photos shown in Fig 3A). In general, PXT3003 short-term treatment did not cause any adverse effects on histological level in wildtype rats (Fig 3B and 3C, and S1E and S1F Fig). As expected, we observed less myelinated axons in CMT1A compared to the wildtype controls, both in the sciatic nerve (approx. 5%) (Fig 3B) and the tibial nerve (approx. 5%) (S1D Fig) being in line with previous studies [27,32,34]. Early short-term treatment with PXT3003 did not significantly restore axonal loss in CMT1A rats compared to CMT1A controls, although a trend towards more myelinated axons may be assumed (Fig 3B and S1D Fig). However, a more detailed analysis revealed a significantly reduced mean axonal diameter in CMT1A controls compared to wildtypes, and this was significantly improved in PXT3003-2 short-term treated CMT1A rats (Fig 3C). We therefore then analysed the relative axon diameter distribution in the sciatic nerve and observed a significant loss of predominantly large-calibre axons above 5–6  $\mu\text{m}$  in CMT1A controls compared to the wildtype situation (Fig 3F). On the other hand, there was a significant relative increase in mid-calibre axons of 3–4  $\mu\text{m}$  (Fig 3E), and a trend for more small calibre axons of 1–2  $\mu\text{m}$  in CMT1A controls. Interestingly, short-term treatment with PXT3003-2 and PXT3003-3 significantly improved this disturbed axon calibre distribution in CMT1A rats for large 5–6  $\mu\text{m}$  (Fig 3D and 3F), mid 3–4  $\mu\text{m}$  (Fig 3D and 3E) and small 1–2  $\mu\text{m}$  axons (Fig 3D).

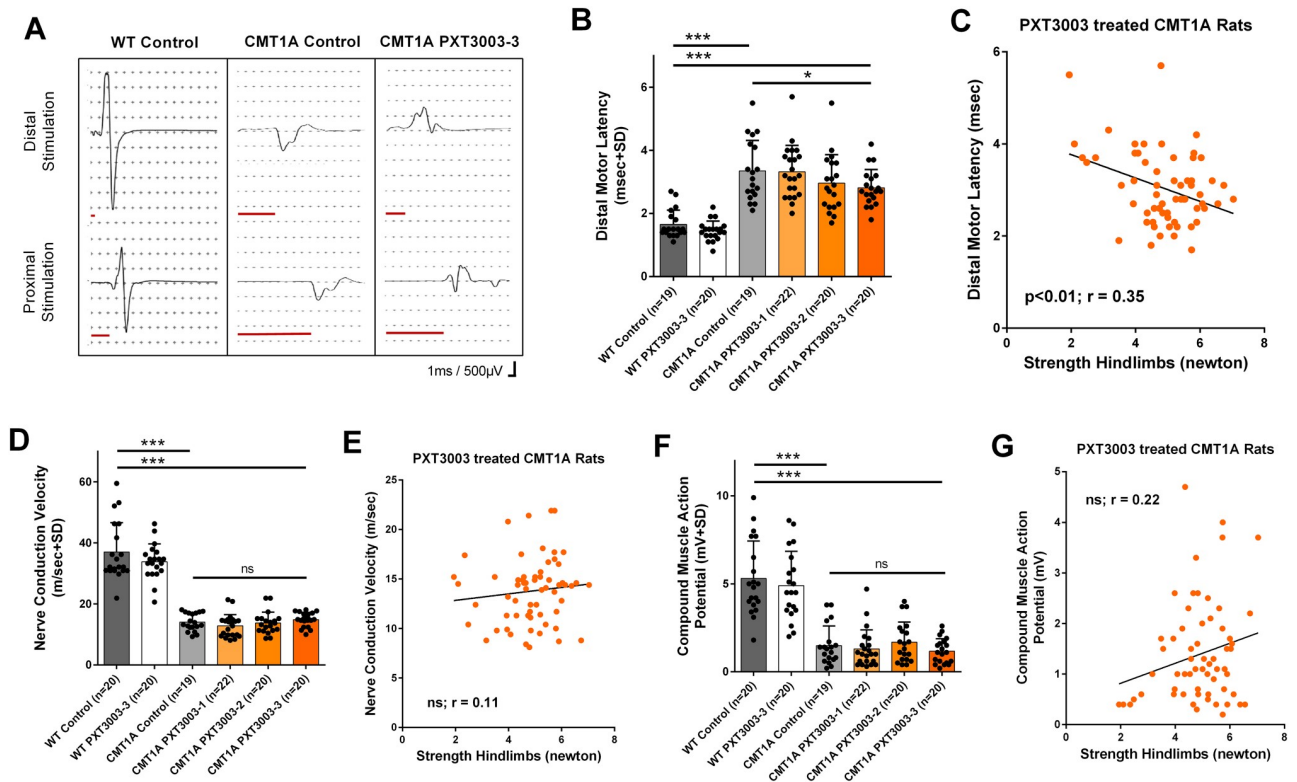

**Fig 2. Improved motor latency correlating with the phenotype at study end.** Electrophysiological recordings including motor latency (red bar), nerve conduction velocity (NCV) and compound muscle potential (CMAP) analysis were performed as shown for representative measures (A). CMT1A controls showed prolonged motor latencies, which were dose-dependently improved by PXT3003 early short-term treatment (B; WT controls  $1.66 \pm 0.10$ , CMT1A controls  $3.35 \pm 0.22$ , CMT PXT3003-3  $2.82 \pm 0.13$ ). In long-term observation, the motor latency improvement correlated with the restored grip strength at the hindlimbs including all PXT3003 treated CMT1A rats (C). NCV and CMAP recordings were not affected by PXT3003 in long-term (D and F; WT controls  $37.02 \pm 2.16$ , CMT1A controls  $14.02 \pm 0.67$ , CMT PXT3003-3  $14.86 \pm 0.53$  and WT controls  $5.31 \pm 0.47$ , CMT1A controls  $1.49 \pm 0.25$ , CMT PXT3003-3  $1.18 \pm 0.16$ , respectively), and did not correlate with the hindlimb grip strength of all PXT3003-treated CMT1A rats (E and G). (ns = not significant, \* =  $p < 0.05$  and \*\*\* =  $p < 0.001$ ).

<https://doi.org/10.1371/journal.pone.0209752.g002>

We also measured myelin sheath thickness by g-ratio analysis; a g-ratio of 1 represents pathologically non-myelinated axons and g-ratios below 0.4 pathologically hypermyelinated axons. As described previously, wildtype controls showed a mean g-ratio of approximately 0.6, and CMT1A controls were characterised by a pathological hypermyelination of small-calibre axons combined with hypo- and non-myelinated axons (S1E and S1G Fig). However, myelin thickness in CMT1A rats was not altered by early short-term PXT3003 treatment after long-term observation (S1G–S1J Fig).

### Long-term effects after PXT3003 treatment on *Pmp22*, Schwann cell differentiation and biomarker expression

We confirmed the known significant approx. 1.6-fold *Pmp22* mRNA overexpression in the sciatic nerve of CMT1A controls compared to wildtypes (Fig 4A). We also detected a significant *Pmp22* mRNA overexpression in the more proximal brachial plexus in CMT1A rats, both for total *Pmp22* and splice variant mRNA (S1K and S1L Fig). PXT3003 therapy applied as short-term postnatally dose-dependently reduced *Pmp22* overexpression in CMT1A rats in the sciatic nerve for PXT3003-3 (Fig 4A) and in the brachial plexus when normalised to *Cyclophilin A* (S1K Fig). When normalised to *Mpz*, the downregulation was even more prominent



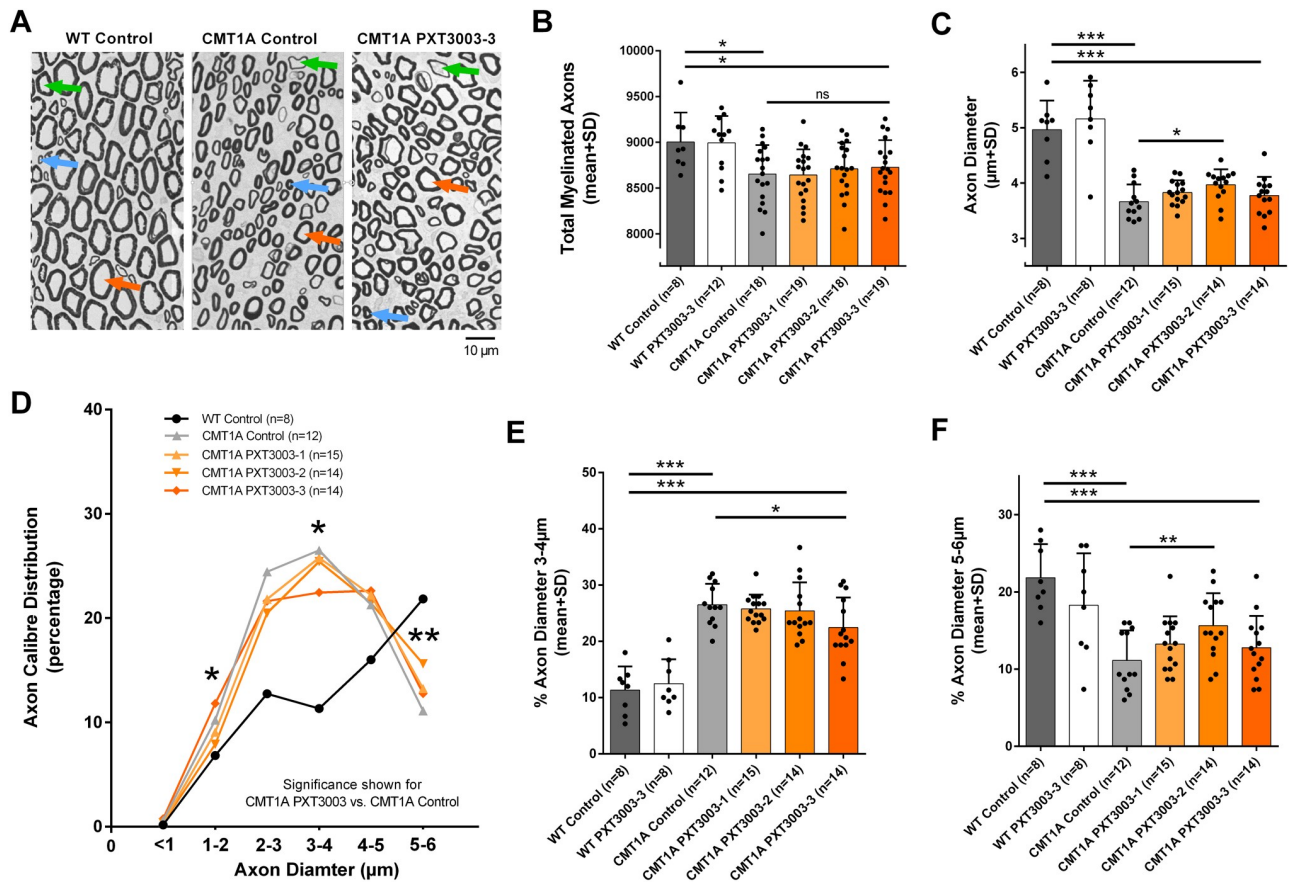

**Fig 3. Shift towards large-calibre axons in the long-term observation.** Histological analyses were performed on light microscopic level in the sciatic nerve as demonstrated in representative peripheral nerve cross sections. In contrast to WT controls, untreated CMT1A rats showed a loss of large-calibre axons (orange arrow) combined with a hypomyelination of predominantly large axons (green arrow) and a hypermyelination of predominantly small-calibre axons (blue arrow). A higher number of large-calibre axons appeared after PXT3003 treatment in CMT1A rats, without obvious differences between hypo- and hypermyelinated axons (A). Quantification of myelinated axons confirmed axonal loss in CMT1A controls not being affected by PXT3003 treatment (B; WT controls  $9003 \pm 114$ , CMT1A controls  $8654 \pm 74$ , CMT PXT3003-3  $8727 \pm 68$ ); however PXT3003 partially corrected the reduced mean axon diameter (C; WT controls  $4.96 \pm 0.19$ , CMT1A controls  $3.66 \pm 0.09$ , CMT PXT3003-2  $3.97 \pm 0.08$ ). More detailed analyses of axon calibre distribution confirmed an obvious loss of large-calibre axons in CMT1A rats, and a shift towards large-calibre axons after PXT3003 treatment (D). Mid- and large-calibre axons were corrected towards the wildtype situation as illustrated in more detail for 3–4µm and 5–6µm axons (E and F; WT controls  $11.33 \pm 1.48$ , CMT1A controls  $26.50 \pm 1.08$ , CMT PXT3003-3  $22.44 \pm 1.43$  and WT controls  $21.83 \pm 1.54$ , CMT1A controls  $11.11 \pm 1.12$ , CMT PXT3003-2  $15.62 \pm 1.13$ , respectively). (ns = not significant, \* =  $p < 0.05$ , \*\*  $p < 0.01$  and \*\*\* =  $p < 0.001$ ).

<https://doi.org/10.1371/journal.pone.0209752.g003>

reaching wildtype ratios (S1L Fig). Moreover, *Sox2* and *cJun*, known differentiation marker in the PNS, were also upregulated in the brachial plexus on the transcriptional level in CMT1A controls compared to the wildtype situation as described previously for sciatic nerve [27]. Both differentiation markers were dose-dependently corrected by PXT3003-3 (Fig 4B and 4C). *Ctsa*, a known biomarker originally identified from skin [15], was comparably expressed in CMT1A and wildtype controls but importantly, PXT3003-2 and PXT3003-3 short-term treated CMT1A rats showed long-lasting dose-dependent treatment effects on the transcriptional level (Fig 4D). *Hmgcr* and *Prx*, known lipid synthesis and myelin markers in the sciatic nerve [27], were downregulated also in the brachial plexus in CMT1A rats but not altered after short-term therapy with PXT3003 (Fig 4E and 4F). No effects of PXT3003 short-term treatment were observed on *Pmp22*, differentiation and biomarker mRNA expression in wildtype rats (Fig 4A–4F).

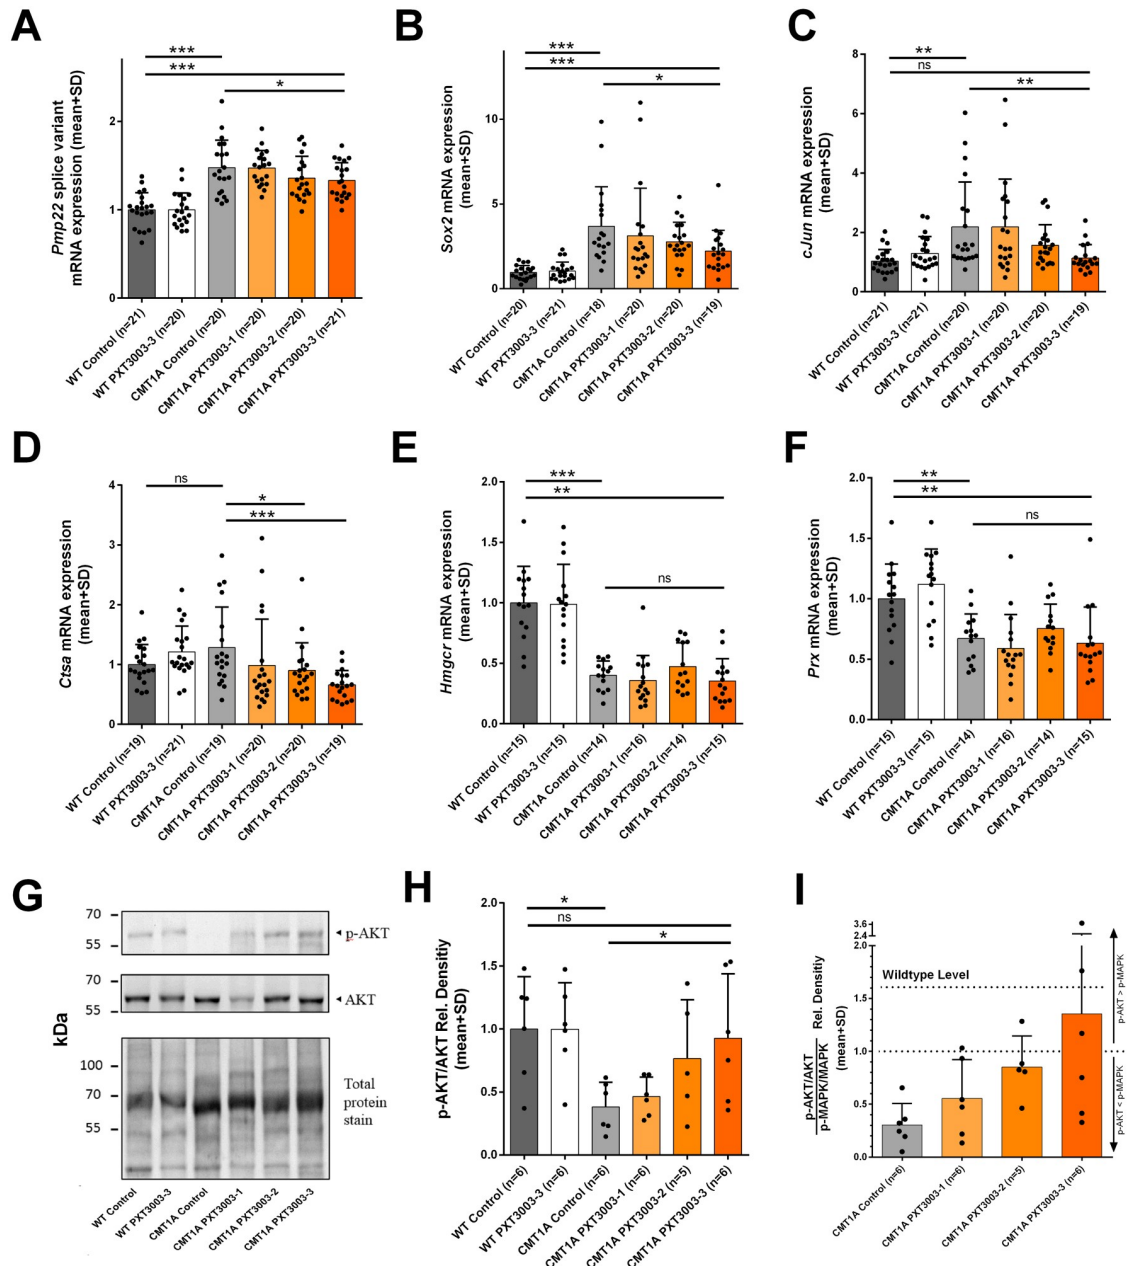

**Fig 4. PXT3003 therapy acting on Pmp22 overexpression and downstream signalling in long-term at 12 weeks.** Early short-term applied PXT3003 was in long-term effective on the downregulation of disease-causing *Pmp22* mRNA overexpression in CMT1A rats in the sciatic nerve (A; WT controls 1.00±0.04, CMT1A controls 1.48±0.07, CMT PXT3003-3 1.33±0.04; *Pmp22* splice variant normalised to *Cyclophilin A*). In the brachial plexus, mRNA expression of the differentiation marker *Sox2* (B; WT controls 1.00±0.09, CMT1A controls 3.68±0.55, CMT PXT3003-3 2.22±0.28; normalised to *Cyclophilin A* and *Rplp0*) and *cJun* (C; WT controls 1.00±0.09, CMT1A controls 2.18±0.34, CMT PXT3003-3 1.14±0.10; normalised to *Cyclophilin A* and *Rplp0*), as well as the biomarker *Ctss* were influenced by PXT3003 in long-term observation (D; WT controls 1.00±0.08, CMT1A controls 1.28±0.16, CMT PXT3003-3 0.66±0.06; normalised to *Cyclophilin A* and *Rplp0*). Downregulated *Hmgcr* and *Prx* mRNA expression in CMT1A rats were not affected by PXT3003 (E; WT controls 1.00±0.08, CMT1A controls 0.40±0.03, CMT PXT3003-3 0.35±0.05 and F; WT controls 1.00±0.07, CMT1A controls 0.67±0.05, CMT PXT3003-3 0.63±0.08; normalised to *Cyclophilin A* and *Rplp0*). *Pmp22* downstream signalling was investigated by Western Blot analysis using antibodies against p-AKT/AKT and p-MAPK/MAPK (G). At the end of long-term observation, PXT3003 early short-term treatment restored the decreased p-AKT/AKT signalling in CMT1A rats (H; WT controls 1.00±0.17, CMT1A controls 0.38±0.08, CMT PXT3003-3 0.93±0.21) and dose-dependently corrected the disrupted ratio of p-AKT/AKT to p-MAPK/MAPK signalling towards the wildtype situation (I; CMT1A controls 0.30±0.08, CMT PXT3003-1 0.56±0.15, CMT PXT3003-2 0.85±0.13, CMT PXT3003-3 1.36±0.52), which is characterized by a higher relative amount of p-AKT versus p-MAPK. (ns = not significant, \* = p<0.05, \*\*p<0.01 and \*\*\* = p<0.001).

<https://doi.org/10.1371/journal.pone.0209752.g004>

## Long-term impact on dysbalanced *Pmp22* downstream signalling pathways

Western Blotting analysis was performed to investigate the long-lasting effect of PXT3003 short-term treatment on known downstream signaling pathways in CMT1A rats. As described previously [27], the ratio of phosphorylated/non-phosphorylated PI3K-AKT was significantly reduced in CMT1A controls compared to wildtype controls (representative bands shown in Fig 4G). PXT3003 treatment in CMT1A rats increased this disturbed ratio in a dose-dependent manner reaching wildtype levels at the dosage PXT3003-3 (Fig 4H). The ratio of phosphorylated/non-phosphorylated MEK-ERK was not significantly regulated in 12 weeks aged rats, neither between CMT1A and wildtype controls nor after PXT3003 treatment. However, we observed a trend of a higher ratio of phosphorylated/non-phosphorylated MEK-ERK in CMT1A controls, which was decreased by PXT3003 treatment after long-term observation in single animals (S1M Fig). Hence, early postnatal short-term PXT3003 therapy corrected dose-dependently the disrupted ratio of p-AKT/AKT to p-MAPK/MAPK towards wildtype levels (Fig 4I).

## Discussion

In contrast to progesterone antagonists [32,34], the growth factor neuregulin [27] or, more recently, *Pmp22*-targeting antisense oligonucleotides [35,36], a preclinical early treatment trial in young CMT1A rats with PXT3003 is more easily translatable to young adults or even children with CMT1A due to its good safety profile. No adverse effects were observed in the wildtype or CMT1A rats treated with PXT3003 with regard to the weight, phenotype, electrophysiological parameters, histological abnormalities and molecular biology. Early short-term PXT3003 treatment during the peak time of myelination for approximately 2 weeks ameliorated the behavioural phenotype of CMT1A rats in a dose-dependent manner. First therapeutic effects of PXT3003 were already present in young 3 weeks aged CMT1A rats directly after the treatment period, when analysing the muscle strength of the forelimbs and the inclined plane performance. At this time point, PXT3003 effects were also present as dose-dependent trends for muscle strength increase in the hindlimbs, possibly owing to longer axons. Until 12 weeks of age in CMT1A rats the levels of hindlimb muscle strength and inclined plane performance continuously increased reaching wildtype levels after PXT3003 short-term treatment. We note that the drug effect disappeared for the forelimbs until study end. However, forelimb muscle strength is limited for the long-term monitoring of drug effects since motor strength development—contrary to the hindlimbs—reaches wildtype levels in CMT1A controls in long-term [32]. Therefore, drug effects in the forelimbs may be compensated by model limitations.

The effect of PXT3003 early short-term treatment in CMT1A rats during the critical time window of Schwann cell differentiation is reminiscent of the effect of rhNRG treatment regimen [27]. Both therapeutic approaches successfully restored the phenotype performance of CMT1A rats towards wildtype level without the need for chronic drug application. rhNRG treatment in CMT1A rats corrected the dysdifferentiation status of Schwann cells, however without effects on *Pmp22* levels itself. In contrast, we here observed that PXT3003 short-term treatment downregulated *Pmp22* overexpression, a potential target for other preclinical trials in CMT1A rats [15,34,35,37], as demonstrated in two different peripheral nerves. We also observed a long-lasting improved misbalance in the PI3K-AKT and MEK-ERK downstream signaling pathway in sciatic nerves of CMT1A rats after PXT3003 short-term treatment. In contrast to *Pmp22* transgenic rats, mice lacking one copy of *Pmp22* [38], displayed increased PI3K-AKT signaling in sciatic nerve, which suggests a direct effect of cellular *Pmp22* levels on PI3K-AKT signaling [27]. This argues that early short-term PXT3003 treatment

downregulated *Pmp22* mRNA overexpression, improved the downstream PI3K-AKT / MEK-ERK signaling pathway, and thereby influenced the differentiation status of Schwann cells in long-term as shown by a dose dependent effect on the dedifferentiation markers *cJun* and *Sox2*. This may, in turn, enable an improved long-lasting axonal support function of Schwann cells in CMT1A rats [39].

Surprisingly, we did not observe an altered myelin sheath thickness in peripheral nerve of PXT3003 treated CMT1A rats, and in line PXT3003 therapy had no effects on the major lipid synthesizing *Hmgcr* or the myelin marker *Prx* expression. The loss of myelinated axons was also not restored in long-term. Obviously, neither the number of myelinated axons nor the myelin deficits contributed to the restored long-term phenotype performance in CMT1A rats. On the other hand, a time delay between phenotypical and histological effects may be assumed, and treatment effects may become more evident after longer early treatment regimens as already reported for the long-term application of PXT3003 in adult CMT1A rats over 4 months [24].

However, a more detailed analysis of axon calibre sizes in peripheral nerve identified a disturbed axon calibre distribution towards small-calibre axons in CMT1A rats, which reflects a relative loss of large motor axons in CMT1A, and PXT3003 treatment in CMT1A rats shifted the disturbed axon calibre distribution towards wildtype levels, similar to previous studies [32]. In addition, electrophysiological analysis identified improved distal motor latencies (DML) after PXT3003 short-term treatment in CMT1A rats compared to CMT1A controls which correlated with the improved phenotype performance after long-term observation, similar to the exploratory clinical phase 2 study in CMT1A patients [25,26]. The DML is thought to include saltatory conduction speed, but also terminal transmission of the nerve into the muscle via the neuromuscular junction (NMJ). Altered NMJ innervation has been described for the Connexin32 mouse model of human CMTX, but not for CMT1A [40]. Therefore, PXT3003 short-term treatment in CMT1A rats may support functional axonal integrity of predominantly larger calibre motor axons uncoupled from dysmyelination and may functionally enhance terminal muscle innervation at the NMJ, both contributing to rescued long-term muscle strength.

We conclude that short-term treatment with PXT3003 during early development partially prevents the long-term phenotypical manifestations in CMT1A rats, similar to levels after a later, but longer treatment [24]. Long-term effects can be explained by an improved Schwann cell differentiation leading to enhanced axonal support of predominantly large-caliber axons, and possibly a proper terminal transmission at the NMJ. Since we observed increasing phenotype effects over time reaching wildtype levels at study end, one may argue for positive long-term effects beyond the age of 12 weeks. However, the histological deficits were not dramatically improved and longer effects until late adulthood must be investigated in a separate study. If translated to CMT1A patients, treatment initiation should preferentially begin as early as possible (e.g. in childhood), in order to slow down or even prevent the progression of the disease.

## Supporting information

**S1 Fig. Complementary phenotypical, histological and molecular observations.** At treatment start, i.e. before the manifestation of obvious phenotype deficits, body weights did not differ between 6 days aged wildtype and CMT1A controls, and all CMT1A PXT3003 groups showed comparable body weights representing a well-balanced randomisation (A; WT controls  $31.79 \pm 0.75$ , CMT1A controls  $29.61 \pm 0.99$ , CMT PXT3003-3  $29.51 \pm 1.04$ ). PXT-3003 did not influence body weight development throughout the observational period until 12 weeks

of age (B; WT controls  $475.3 \pm 9.42$ , CMT1A controls  $439.9 \pm 8.56$ , CMT PXT3003-3  $436.2 \pm 7.61$ ). PXT3003 increased forelimb muscle strength in young CMT1A rats but effects disappeared in long-term observation (C). Quantification of myelinated axons was also performed in the tibial nerve and confirmed axonal loss in CMT1A controls not being affected by PXT3003 treatment (D; WT controls  $3234 \pm 31$ , CMT1A controls  $3107 \pm 42$ , CMT PXT3003-3  $3137 \pm 51$ ). Myelin sheath thickness analysis confirmed the presence of non-myelinated axons solely in CMT1A rats (g-ratio = 1) and a shift towards hypomyelinated large-calibre and hypermyelinated small-calibre axons in CMT1A rats (E and G), both not being affected by PXT3003 treatment (G-J). PXT3003 downregulated *Pmp22* mRNA overexpression in CMT1A rats in the plexus brachialis when normalised to both, Cyclophilin A (K; *Pmp22* splice variant, WT controls  $1.00 \pm 0.05$ , CMT1A controls  $1.53 \pm 0.09$ , CMT PXT3003-3  $1.20 \pm 0.08$ ) and *Mpz* (L; total *Pmp22*, WT controls  $1.00 \pm 0.08$ , CMT1A controls  $1.94 \pm 0.28$ , CMT PXT3003-3  $1.09 \pm 0.20$ ). p-MAPK/MAPK signalling was neither significantly regulated between WT and CMT1A controls nor after PXT3003 treatment in WT and CMT1A rats at the age of 12 weeks although strong trends were observed (M; WT controls  $1.00 \pm 0.27$ , CMT1A controls  $1.74 \pm 0.62$ , CMT PXT3003-3  $0.88 \pm 0.12$ ). (ns = not significant, \* =  $p < 0.05$ , \*\*  $p < 0.01$  and \*\*\* =  $p < 0.001$ ).

(TIF)

## Acknowledgments

We thank E. Ciirdaeva, C. Maack, B. Veith and L. Winter for excellent technical assistance in histological and biomolecular processing, and M. Wehe and D. Funk for excellent animal care. We also thank Dr. Viviane Bertrand from Pharnext for providing the protocol of the stable formulation, GMP grade, of PXT3003. We thank Dr. Ilya Chumakov who participated in the selection of sorbitol contained in PXT3003. We are grateful to Gwenaël Primas who designed and validated the primers of *Pmp22* splice variant.

## Author Contributions

**Conceptualization:** Thomas Prukop, Serguei Nabirovchkin, Klaus-Armin Nave, Rodolphe Hajj, Daniel Cohen, Michael W. Sereda.

**Data curation:** Thomas Prukop, Jan Stenzel, Stephanie Wernick, Theresa Kungl, Magdalena Mroczek, Julia Adam, David Ewers.

**Writing – original draft:** Thomas Prukop, Michael W. Sereda.

**Writing – review & editing:** Klaus-Armin Nave, Rodolphe Hajj, Daniel Cohen.

## References

1. Skre H. Genetic and clinical aspects of Charcot-Marie-Tooth's disease. *Clin Genet.* 1974; 6: 98–118. PMID: [4430158](#)
2. Braathen GJ, Sand JC, Lobato A, Høyer H, Russell MB. Genetic epidemiology of Charcot-Marie-Tooth in the general population. *Eur J Neurol.* 2011; 18: 39–48. <https://doi.org/10.1111/j.1468-1331.2010.03037.x> PMID: [20482598](#)
3. Timmerman V, Strickland AV, Züchner S. Genetics of Charcot-Marie-Tooth (CMT) Disease within the Frame of the Human Genome Project Success. *Genes (Basel).* 2014; 5: 13–32. <https://doi.org/10.3390/genes5010013> PMID: [24705285](#)
4. Rossor AM, Polke JM, Houlden H, Reilly MM. Clinical implications of genetic advances in Charcot-Marie-Tooth disease. *Nat Rev Neurol.* 2013; 9: 562–571. <https://doi.org/10.1038/nrneurol.2013.179> PMID: [24018473](#)

5. Rudnik-Schöneborn S, Tölle D, Senderek J, Eggermann K, Elbracht M, Kornak U, et al. Diagnostic algorithms in Charcot-Marie-Tooth neuropathies. Experiences from a German genetic laboratory on the basis of 1206 index patients. *Clin Genet*. 2016; 89: 34–43. <https://doi.org/10.1111/cge.12594> PMID: 25850958
6. Murphy SM, Laura M, Fawcett K, Pandraud A, Liu Y-T, Davidson GL, et al. Charcot-Marie-Tooth disease. Frequency of genetic subtypes and guidelines for genetic testing. *J Neurol Neurosurg Psychiatry*. 2012; 83: 706–710. <https://doi.org/10.1136/jnnp-2012-302451> PMID: 22577229
7. Lupski JR, Garcia CA. Molecular genetics and neuropathology of Charcot-Marie-Tooth disease type 1A. *Brain Pathol*. 1992; 2: 337–349. PMID: 1341967
8. Raeymaekers P, Timmerman V, Nelis E, de Jonghe P, Hoogendijk JE, Baas F, et al. Duplication in chromosome 17p11.2 in Charcot-Marie-Tooth neuropathy type 1a (CMT 1a). The HMSN Collaborative Research Group. *Neuromuscul Disord*. 1991; 1: 93–97. PMID: 1822787
9. Patel PI, Garcia C, Montes de Oca-Luna R, Malamut RI, Franco B, Slaugenhaupt S, et al. Isolation of a marker linked to the Charcot-Marie-Tooth disease type IA gene by differential Alu-PCR of human chromosome 17-retaining hybrids. *Am J Hum Genet*. 1990; 47: 926–934. PMID: 1978559
10. Pareyson D, Saveri P, Piscosquito G. Charcot-Marie-Tooth Disease and Related Hereditary Neuropathies. From Gene Function to Associated Phenotypes. *Curr Mol Med*. 2014; 14: 1009–1033. <https://doi.org/10.2174/1566524014666141010154205> PMID: 25323870
11. Berciano J, García A, Gallardo E, Ramón C, Combarros O. Phenotype and clinical evolution of Charcot-Marie-Tooth disease type 1A duplication. *Adv Exp Med Biol*. 2009; 652: 183–200. [https://doi.org/10.1007/978-90-481-2813-6\\_12](https://doi.org/10.1007/978-90-481-2813-6_12) PMID: 20225026
12. Rossor AM, Evans MRB, Reilly MM. A practical approach to the genetic neuropathies. *Pract Neurol*. 2015; 15: 187–198. <https://doi.org/10.1136/practneurol-2015-001095> PMID: 25898997
13. Saporta ASD, Sottile SL, Miller LJ, Feely SME, Siskind CE, Shy ME. Charcot-Marie-Tooth disease subtypes and genetic testing strategies. *Ann Neurol*. 2011; 69: 22–33. <https://doi.org/10.1002/ana.22166> PMID: 21280073
14. Fledrich R, Stassart RM, Sereda MW. Murine therapeutic models for Charcot-Marie-Tooth (CMT) disease. *Br Med Bull*. 2012; 102: 89–113. <https://doi.org/10.1093/bmb/lds010> PMID: 22551516
15. Fledrich R, Schlotter-Weigel B, Schnizer TJ, Wichert SP, Stassart RM, Meyer zu Hörste G, et al. A rat model of Charcot-Marie-Tooth disease 1A recapitulates disease variability and supplies biomarkers of axonal loss in patients. *Brain*. 2012; 135: 72–87. <https://doi.org/10.1093/brain/awr322> PMID: 22189569
16. Yiu EM, Burns J, Ryan MM, Ouvrier RA. Neurophysiologic abnormalities in children with Charcot-Marie-Tooth disease type 1A. *J Peripher Nerv Syst*. 2008; 13: 236–241. <https://doi.org/10.1111/j.1529-8027.2008.00182.x> PMID: 18844790
17. Burns J, Raymond J, Ouvrier R. Feasibility of foot and ankle strength training in childhood Charcot-Marie-Tooth disease. *Neuromuscul Disord*. 2009; 19: 818–821. <https://doi.org/10.1016/j.nmd.2009.09.007> PMID: 19819697
18. Cornett KMD, Menezes MP, Bray P, Halaki M, Shy RR, Yum SW, et al. Phenotypic Variability of Childhood Charcot-Marie-Tooth Disease. *JAMA Neurol*. 2016; 73: 645–651. <https://doi.org/10.1001/jamaneurol.2016.0171> PMID: 27043305
19. Rossor AM, Tomaselli PJ, Reilly MM. Recent advances in the genetic neuropathies. *Curr Opin Neurol*. 2016; 29: 537–548. <https://doi.org/10.1097/WCO.0000000000000373> PMID: 27584852
20. Young P, de Jonghe P, Stögbauer F, Butterfass-Bahloul T. Treatment for Charcot-Marie-Tooth disease. *Cochrane Database Syst Rev*. 2008; CD006052. <https://doi.org/10.1002/14651858.CD006052.pub2> PMID: 18254090
21. Micallef J, Attarian S, Dubourg O, Gonnaud P-M, Hogrel J-Y, Stojkovic T, et al. Effect of ascorbic acid in patients with Charcot-Marie-Tooth disease type 1A. A multicentre, randomised, double-blind, placebo-controlled trial. *Lancet Neurol*. 2009; 8: 1103–1110. [https://doi.org/10.1016/S1474-4422\(09\)70260-1](https://doi.org/10.1016/S1474-4422(09)70260-1) PMID: 19818690
22. Verhamme C, de Haan RJ, Vermeulen M, Baas F, de Visser M, van Schaik IN. Oral high dose ascorbic acid treatment for one year in young CMT1A patients. A randomised, double-blind, placebo-controlled phase II trial. *BMC Med*. 2009; 7: 70. <https://doi.org/10.1186/1741-7015-7-70> PMID: 19909499
23. Pareyson D, Reilly MM, Schenone A, Fabrizi GM, Cavallaro T, Santoro L, et al. Ascorbic acid in Charcot-Marie-Tooth disease type 1A (CMT-TRIAAL and CMT-TRAUK). A double-blind randomised trial. *Lancet Neurol*. 2011; 10: 320–328. [https://doi.org/10.1016/S1474-4422\(11\)70025-4](https://doi.org/10.1016/S1474-4422(11)70025-4) PMID: 21393063
24. Chumakov I, Milet A, Cholet N, Primas G, Boucard A, Pereira Y, et al. Polytherapy with a combination of three repurposed drugs (PXT3003) down-regulates Pmp22 over-expression and improves myelination, axonal and functional parameters in models of CMT1A neuropathy. *Orphanet J Rare Dis*. 2014; 9: 201. <https://doi.org/10.1186/s13023-014-0201-x> PMID: 25491744

25. Attarian S, Vallat J-M, Magy L, Funalot B, Gonnaud P-M, Lacour A, et al. An exploratory randomised double-blind and placebo-controlled phase 2 study of a combination of baclofen, naltrexone and sorbitol (PXT3003) in patients with Charcot-Marie-Tooth disease type 1A. *Orphanet J Rare Dis*. 2014; 9: 199. <https://doi.org/10.1186/s13023-014-0199-0> PMID: 25519680
26. Attarian S, Vallat J-M, Magy L, Funalot B, Gonnaud P-M, Lacour A, et al. Erratum to. An exploratory randomised double-blind and placebo-controlled phase 2 study of a combination of baclofen, naltrexone and sorbitol (PXT3003) in patients with Charcot-Marie-Tooth disease type 1A. *Orphanet J Rare Dis*. 2016; 11: 92. <https://doi.org/10.1186/s13023-016-0463-6> PMID: 27387831
27. Fledrich R, Stassart RM, Klink A, Rasch LM, Prukop T, Haag L, et al. Soluble neuregulin-1 modulates disease pathogenesis in rodent models of Charcot-Marie-Tooth disease 1A. *Nat Med*. 2014; 20: 1055–1061. <https://doi.org/10.1038/nm.3664> PMID: 25150498
28. Jessen KR, Mirsky R. The origin and development of glial cells in peripheral nerves. *Nat Rev Neurosci*. 2005; 6: 671–682. <https://doi.org/10.1038/nrn1746> PMID: 16136171
29. Michailov GV, Sereda MW, Brinkmann BG, Fischer TM, Haug B, Birchmeier C, et al. Axonal neuregulin-1 regulates myelin sheath thickness. *Science*. 2004; 304: 700–703. <https://doi.org/10.1126/science.1095862> PMID: 15044753
30. Sereda M, Griffiths I, Pühlhofer A, Stewart H, Rossner MJ, Zimmerman F, et al. A transgenic rat model of Charcot-Marie-Tooth disease. *Neuron*. 1996; 16: 1049–1060. PMID: 8630243
31. Rivlin AS, Tator CH. Objective clinical assessment of motor function after experimental spinal cord injury in the rat. *J Neurosurg*. 1977; 47: 577–581. <https://doi.org/10.3171/jns.1977.47.4.0577> PMID: 903810
32. Meyer zu Horste G, Prukop T, Liebetanz D, Mobius W, Nave K-A, Sereda MW. Antiprogestosterone therapy uncouples axonal loss from demyelination in a transgenic rat model of CMT1A neuropathy. *Ann Neurol*. 2007; 61: 61–72. <https://doi.org/10.1002/ana.21026> PMID: 17262851
33. Visigalli D, Castagnola P, Capodivento G, Geroldi A, Bellone E, Mancardi G, et al. Alternative Splicing in the Human PMP22 Gene. Implications in CMT1A Neuropathy. *Hum Mutat*. 2016; 37: 98–109. <https://doi.org/10.1002/humu.22921> PMID: 26486801
34. Sereda MW, Meyer zu Hörste G, Suter U, Uzma N, Nave K-A. Therapeutic administration of progesterone antagonist in a model of Charcot-Marie-Tooth disease (CMT-1A). *Nat Med*. 2003; 9: 1533–1537. <https://doi.org/10.1038/nm957> PMID: 14608378
35. Zhao HT, Damle S, Ikeda-Lee K, Kuntz S, Li J, Mohan A, et al. PMP22 antisense oligonucleotides reverse Charcot-Marie-Tooth disease type 1A features in rodent models. *J Clin Invest*. 2017. <https://doi.org/10.1172/JCI96499> PMID: 29202483
36. Shy ME. Antisense oligonucleotides offer hope to patients with Charcot-Marie-Tooth disease type 1A. *J Clin Invest*. 2017. <https://doi.org/10.1172/JCI98617> PMID: 29199996
37. Sociali G, Visigalli D, Prukop T, Cervellini I, Mannino E, Venturi C, et al. Tolerability and efficacy study of P2X7 inhibition in experimental Charcot-Marie-Tooth type 1A (CMT1A) neuropathy. *Neurobiol Dis*. 2016; 95: 145–157. <https://doi.org/10.1016/j.nbd.2016.07.017> PMID: 27431093
38. Adlkofer K, Martini R, Aguzzi A, Zielasek J, Toyka KV, Suter U. Hypermyelination and demyelinating peripheral neuropathy in Pmp22-deficient mice. *Nat Genet*. 1995; 11: 274–280. <https://doi.org/10.1038/ng1195-274> PMID: 7581450
39. Nave K-A. Myelination and support of axonal integrity by glia. *Nature*. 2010; 468: 244–252. <https://doi.org/10.1038/nature09614> PMID: 21068833
40. Groh J, Heintz K, Kohl B, Wessig C, Greeske J, Fischer S, et al. Attenuation of MCP-1/CCL2 expression ameliorates neuropathy in a mouse model for Charcot-Marie-Tooth 1X. *Hum Mol Genet*. 2010; 19: 3530–3543. <https://doi.org/10.1093/hmg/ddq269> PMID: 20591826
